# Supplementary material for: Analysis of DNA Methylation Profiles in Mandibular Condyle of Chicks With Crossed Beaks Using Whole-Genome Bisulfite Sequencing
Source: Front Genet. 2021 Jul 8;12:680115. doi: 10.3389/fgene.2021.680115 (PMC8298039; doi:10.3389/fgene.2021.680115)
Supplement: Supplementary Table 6 — The list of DMGs enriched GO terms for CHH context. [file Table_6.XLSX]

## Sheet: GO
GO terms	GO ID	DMGs Count	genes	P-value
RNA-dependent DNA biosynthetic process	GO:0006278	14	ENSGALG00000051046; ENSGALG00000051399; ENSGALG00000052928; CCDC12; ENSGALG00000052233; ENSGALG00000050241; ENSGALG00000046715; ENSGALG00000050847; ENSGALG00000053213; ENSGALG00000051525; ENSGALG00000049807; ENSGALG00000049023; ENSGALG00000052917; ENSGALG00000046848	7.61912e-07
positive regulation of synapse assembly	GO:0051965	9	FLRT2; NRXN3; SLITRK1; SLITRK6; ADGRB3; LRRN3; EPHB2; LRRTM1; LINGO2	6.59945e-06
embryonic viscerocranium morphogenesis	GO:0048703	5	WNT11; HAND2; LOC112532921; TBX1; MTHFD1L	0.000114018
thymus development	GO:0048538	6	CITED2; PAX1; GATA3; TBX1; TYR; HAND2	0.00015192
parathyroid gland development	GO:0060017	3	PAX1; TBX1; GATA3	0.000270533
palate development	GO:0060021	8	CSRNP1; EPHB2; PDGFRA; MSX1; INSIG1; ALX1; VAX1; HAND2	0.000513587
cardiac right ventricle morphogenesis	GO:0003215	3	SEMA3C; GATA3; ISL1	0.000655604
respiratory gaseous exchange	GO:0007585	4	DACH1; LOC101747503; FUT8; ENSGALG00000050907	0.000747954
ventricular cardiac muscle tissue morphogenesis	GO:0055010	4	RXRA; BMP10; ISL1; MYL3	0.000747954
positive regulation of transcription from RNA polymerase II promoter	GO:0045944	32	ENSGALG00000053954; CSRNP1; SOX10; ONECUT1; MEOX1; ENSGALG00000038454; TBL1X; EGR1; MSX1; FOXA2; LDB2; PAX2; CITED2; PAX1; UBE3A; GATA3; NKX2-2; ALX1; PIK3R1; ETS1; ISL1; EN2; PGR; LOC107050371; TFAP2D; PAX3; HOXB4; AKIRIN2; TBX5; TET2; FLI1; CASK	0.000868769
negative regulation of axon extension	GO:0030517	3	RTN4R; NTN1; RTN4	0.0012711
aging	GO:0007568	3	PDE4D; ENSGALG00000046863; KL	0.0012711
regulation of ryanodine-sensitive calcium-release channel activity	GO:0060314	3	DMD; PDE4D; ENSGALG00000046863	0.0012711
negative regulation of interleukin-8 secretion	GO:2000483	3	ANXA1; ENSGALG00000050756; ENSGALG00000038550	0.0012711
cartilage morphogenesis	GO:0060536	3	MSX1; HAND2; LOC112532921	0.0012711
liver development	GO:0001889	5	ENSGALG00000038454; ONECUT1; CITED2; HGF; CPS1	0.00137187
bone morphogenesis	GO:0060349	4	CYP26B1; PAX1; MSX1; CITED2	0.00151745
bone mineralization	GO:0030282	4	PTH2R; PHEX; WNT11; SHOX	0.00151745
regulation of secondary heart field cardioblast proliferation	GO:0003266	2	HAND2; ISL1	0.00169946
auditory behavior	GO:0031223	2	SLITRK6; SLC1A3	0.00169946
negative regulation of cellular response to growth factor stimulus	GO:0090288	2	CASK; SLIT2	0.00169946
pattern recognition receptor signaling pathway	GO:0002221	2	PGLYRP2; CD36	0.00169946
spinal cord oligodendrocyte cell fate specification	GO:0021530	2	NKX2-2; OLIG2	0.00169946
melanocyte differentiation	GO:0030318	4	MREG; OCA2; TYRP1; SOX10	0.00205587
adult heart development	GO:0007512	3	HAND2; GJA1; BMP10	0.00215654
inner ear morphogenesis	GO:0042472	6	FGF9; GATA3; EPHB2; INSIG1; NTN1; SPRY2	0.00278861
retinal ganglion cell axon guidance	GO:0031290	3	EPHB2; EPHA7; ISL1	0.00334536
viral process	GO:0016032	4	ENSGALG00000053886; ENSGALG00000046715; LOC107050476; ENSGALG00000049807	0.0035011
midbrain development	GO:0030901	4	MSX1; EN2; TLE4; ZIC5	0.00443126
cell maturation	GO:0048469	4	SOX10; PTH2R; GATA3; ENSGALG00000053954	0.00443126
digestive tract development	GO:0048565	4	ENSGALG00000038454; NKX2-2; LOC107050371; GATA3	0.00443126
negative regulation of wound healing	GO:0061045	2	WFDC1; CASK	0.00495883
negative regulation of relaxation of cardiac muscle	GO:1901898	2	PDE4D; ENSGALG00000046863	0.00495883
endocardial cushion development	GO:0003197	2	TBX5; CITED2	0.00495883
sclerotome development	GO:0061056	2	MEOX1; PAX1	0.00495883
peripheral nervous system development	GO:0007422	2	SOX10; CITED2	0.00495883
protein localization to synapse	GO:0035418	2	MAGI2; LRRTM1	0.00495883
nephric duct formation	GO:0072179	2	GATA3; PAX2	0.00495883
glutamate biosynthetic process	GO:0006537	2	ALDH4A1; SLC1A3	0.00495883
outflow tract morphogenesis	GO:0003151	4	WNT11; NPY5R; CITED2; SEMA3C	0.00551454
negative regulation of peptidyl-serine phosphorylation	GO:0033137	4	ENSGALG00000046863; PDE4D; DMD; HGF	0.00551454
neural crest cell migration	GO:0001755	5	ISL1; SEMA3C; ALX1; SEMA6A; SOX10	0.00610652
negative regulation of inflammatory response	GO:0050728	5	GATA3; HGF; ETS1; WFDC1; ISL1	0.00610652
positive regulation of interleukin-2 production	GO:0032743	3	ANXA1; PDE4D; ENSGALG00000046863	0.00673993
limb bud formation	GO:0060174	3	TBX5; SEMA3C; HAND2	0.00673993
regulation of heart rate	GO:0002027	3	PDE4D; DMD; ENSGALG00000046863	0.00673993
positive regulation of cardiac muscle cell proliferation	GO:0060045	3	TBX5; BMP10; FGF9	0.00673993
muscle organ development	GO:0007517	3	PAX3; LMNA; MSX1	0.00673993
face morphogenesis	GO:0060325	4	PDGFRA; WNT11; CSRNP1; MSX1	0.00676131
cell adhesion	GO:0007155	8	MPDZ; COL12A1; POSTN; LSAMP; CNTN5; SORBS2; HAPLN1; NRXN3	0.00723157
negative regulation of cell growth	GO:0030308	6	BMP10; GJA1; WNT11; CDKN1B; SLIT2; MSX1	0.00794368
negative regulation of JAK-STAT cascade	GO:0046426	4	FLRT2; RTN4R; DCN; LRRTM1	0.00818128
negative chemotaxis	GO:0050919	4	EPHA7; SEMA6A; FLRT2; SEMA3C	0.00818128
cell fate determination	GO:0001709	3	GATA3; CYP26B1; TLE4	0.00898692
negative regulation of protein kinase activity	GO:0006469	5	DCN; FLRT2; CAMK2N2; RTN4R; LRRTM1	0.00936071
regulation of cAMP metabolic process	GO:0030814	2	ENSGALG00000046863; PDE4D	0.00964713
positive regulation of interleukin-5 production	GO:0032754	2	ENSGALG00000046863; PDE4D	0.00964713
negative regulation of transporter activity	GO:0032410	2	NDFIP2; CTTNBP2NL	0.00964713
positive regulation of transcription regulatory region DNA binding	GO:2000679	2	GATA3; HAND2	0.00964713
nitric oxide mediated signal transduction	GO:0007263	2	ENSGALG00000038454; CD36	0.00964713
exploration behavior	GO:0035640	2	LRRTM1; HTR1A	0.00964713
mesenchymal cell proliferation	GO:0010463	2	MSX1; HAND2	0.00964713
regulation of hormone secretion	GO:0046883	2	ANXA1; HTR1A	0.00964713
embryonic limb morphogenesis	GO:0030326	4	CYP26B1; ALX1; FBN2; FGF9	0.0097835
regulation of cell migration	GO:0030334	4	LAMA4; RTN4; NTN1; LMNA	0.0115763
pharyngeal system development	GO:0060037	3	GATA3; TBX1; ISL1	0.0116207
adrenal gland development	GO:0030325	3	NR0B1; PDGFRA; WNT11	0.0116207
camera-type eye development	GO:0043010	4	MAB21L1; VAX1; RXRA; FBN2	0.0135672
lens development in camera-type eye	GO:0002088	3	SLITRK6; GJA1; GATA3	0.0146517
negative regulation of heart contraction	GO:0045822	2	ENSGALG00000046863; PDE4D	0.0156415
Leydig cell differentiation	GO:0033327	2	PDGFRA; NR0B1	0.0156415
positive regulation of oligodendrocyte differentiation	GO:0048714	2	OLIG2; NKX2-2	0.0156415
positive regulation of cardiac muscle hypertrophy	GO:0010613	2	MTPN; BMP10	0.0156415
spinal cord association neuron differentiation	GO:0021527	2	ISL1; LHX5	0.0156415
positive regulation of interleukin-12 production	GO:0032735	2	CD36; ISL1	0.0156415
positive regulation of glucose import in response to insulin stimulus	GO:2001275	2	PIK3R1; OSBPL8	0.0156415
ventricular cardiac muscle cell differentiation	GO:0055012	2	RXRA; ISL1	0.0156415
lung-associated mesenchyme development	GO:0060484	2	FGF9; WNT11	0.0156415
melanin biosynthetic process	GO:0042438	2	OCA2; TYR	0.0156415
semaphorin-plexin signaling pathway	GO:0071526	3	SEMA6A; PLXNC1; SEMA3C	0.0180869
negative regulation of Ras protein signal transduction	GO:0046580	3	RASA3; SPRY2; LOC101752211	0.0180869
response to estrogen	GO:0043627	3	GATA3; TBL1X; PGR	0.0180869
protein localization to cell surface	GO:0034394	3	FLNA; CPS1; WNT11	0.0180869
spleen development	GO:0048536	4	TET2; ONECUT1; HOXB4; CITED2	0.0207928
adult behavior	GO:0030534	3	SLITRK1; NRXN3; PCDH17	0.0219303
developmental growth	GO:0048589	3	GATA3; DMBX1; SOX10	0.0219303
ventricular cardiac muscle cell development	GO:0055015	2	BMP10; LMNA	0.0228267
neuron projection extension	GO:1990138	2	IQGAP1; NDEL1	0.0228267
cellular response to epinephrine stimulus	GO:0071872	2	ENSGALG00000046863; PDE4D	0.0228267
male sex determination	GO:0030238	2	NR0B1; FGF9	0.0228267
regulation of release of sequestered calcium ion into cytosol by sarcoplasmic reticulum	GO:0010880	2	ENSGALG00000046863; PDE4D	0.0228267
negative regulation of transcription from RNA polymerase II promoter	GO:0000122	22	SIM2; TBX15; ENSGALG00000038454; CD36; TLE4; DMBX1; MSX1; EGR1; FGF9; OLIG2; CXXC5; H2AFY2; DACH1; ALX1; GATA3; ISL1; VAX1; RXRA; PRDM13; NR0B1; LOC107050371; HOXB4	0.0228484
positive regulation of cell migration	GO:0030335	7	DAB2; FAM110C; ONECUT1; HGF; WNT11; PIK3R1; SEMA3C	0.0231229
axonogenesis	GO:0007409	5	SLITRK1; SLITRK6; LRRN3; LINGO2; LRFN3	0.0234089
regulation of transcription from RNA polymerase II promoter	GO:0006357	8	POU3F3; NPAS3; ENSGALG00000050756; ERG; ENSGALG00000038550; ZNF131; ZBED1; LCORL	0.0236462
negative regulation of cell migration	GO:0030336	5	WNT11; OSBPL8; ARAP3; TBX5; DACH1	0.0257884
Notch signaling pathway	GO:0007219	5	S1PR3; ONECUT1; CDKN1B; ENSGALG00000050756; ENSGALG00000038550	0.0257884
positive regulation of interleukin-6 production	GO:0032755	3	CD36; ISL1; AKIRIN2	0.0261832
glucose metabolic process	GO:0006006	3	ONECUT1; ENSGALG00000038454; HK2	0.0261832
cellular response to lipopolysaccharide	GO:0071222	4	ENSGALG00000046863; CMPK2; PDE4D; CD36	0.0267049
brain development	GO:0007420	6	EPHA7; H2AFY2; POU3F3; VAX1; DMBX1; LOC107050371	0.0271112
homophilic cell adhesion via plasma membrane adhesion molecules	GO:0007156	7	PCDH17; FAT3; ENSGALG00000016934; LOC107054472; PCDH1; ENSGALG00000051651; GHITM	0.0284551
negative regulation of sequence-specific DNA binding transcription factor activity	GO:0043433	4	FLNA; NR0B1; FOXA2; HAND2	0.0300006
atrial septum morphogenesis	GO:0060413	2	ISL1; TBX5	0.0310947
axonal fasciculation	GO:0007413	2	EPHB2; RTN4	0.0310947
negative regulation of endothelial cell migration	GO:0010596	2	BMP10; SLIT2	0.0310947
positive regulation of calcium-mediated signaling	GO:0050850	2	ZAP70; HINT2	0.0310947
exocrine pancreas development	GO:0031017	2	ENSGALG00000038454; ISL1	0.0310947
negative regulation of interferon-gamma production	GO:0032689	2	PGLYRP2; GATA3	0.0310947
negative regulation of reactive oxygen species metabolic process	GO:2000378	2	HK2; PAX2	0.0310947
endocrine pancreas development	GO:0031018	2	FOXA2; ONECUT1	0.0310947
male genitalia development	GO:0030539	2	HSD17B3; PDGFRA	0.0310947
cellular glucose homeostasis	GO:0001678	2	HK2; PIK3R1	0.0310947
glucose import	GO:0046323	2	SLC2A10; SLC2A12	0.0310947
cAMP catabolic process	GO:0006198	2	ENSGALG00000046863; PDE4D	0.0310947
regulation of cardiac muscle cell contraction	GO:0086004	2	PDE4D; ENSGALG00000046863	0.0310947
cellular zinc ion homeostasis	GO:0006882	2	SLC39A10; ATP7B	0.0310947
negative regulation of apoptotic process	GO:0043066	11	PIM3; SPRY2; FLNA; DAB2; CITED2; SOX10; CDKN1B; WNT11; ENSGALG00000050753; MSX1; PIK3R1	0.0327239
positive regulation of cell proliferation	GO:0008284	11	ENSGALG00000038454; TGFA; ENSGALG00000047993; CDKN1B; NTN1; ENSGALG00000050753; CNTFR; MAB21L1; ISL1; PTH2R; ENSGALG00000050392	0.0327239
T cell receptor signaling pathway	GO:0050852	4	ZAP70; ENSGALG00000046863; GATA3; PDE4D	0.0335261
positive regulation of endothelial cell migration	GO:0010595	3	GATA3; ETS1; VEGFA	0.0359103
cell-cell signaling	GO:0007267	4	ADRA1D; GJA1; TBX5; VEGFA	0.0372828
glucose transmembrane transport	GO:1904659	2	SLC2A10; SLC2A12	0.0403445
type B pancreatic cell development	GO:0003323	2	NKX2-2; ISL1	0.0403445
positive regulation of transforming growth factor beta receptor signaling pathway	GO:0030511	2	DAB2; CITED2	0.0403445
negative regulation of canonical Wnt signaling pathway	GO:0090090	6	DAB2; ISL1; SOX10; LOC107050371; EGR1; WNT11	0.0447529
positive regulation of interferon-gamma production	GO:0032729	3	ENSGALG00000046863; ISL1; PDE4D	0.0472336
sympathetic nervous system development	GO:0048485	2	GATA3; HAND2	0.0504814
negative regulation of release of cytochrome c from mitochondria	GO:0090201	2	HGF; LMNA	0.0504814
negative regulation of cell cycle	GO:0045786	2	ETS1; GATA3	0.0504814
negative regulation of cell-matrix adhesion	GO:0001953	2	CASK; PIK3R1	0.0504814
signal transduction involved in regulation of gene expression	GO:0023019	2	MSX1; PDGFRA	0.0504814
G-protein coupled purinergic nucleotide receptor signaling pathway	GO:0035589	2	p2ry1; P2RY8	0.0504814
phospholipase C-activating G-protein coupled receptor signaling pathway	GO:0007200	3	ADRA1D; p2ry1; PTH2R	0.0534752
positive regulation of tumor necrosis factor production	GO:0032760	3	ISL1; PIK3R1; CD36	0.0534752
cytokine-mediated signaling pathway	GO:0019221	6	DCN; RTN4R; IFNGR1; FLRT2; IL17REL; LRRTM1	0.0574437
anterior/posterior pattern specification	GO:0009952	5	ALX1; HOXC6; MSX1; HOXB4; EN2	0.0581083
negative regulation of gene expression	GO:0010629	5	GJA1; NDFIP2; PGR; HGF; RNASEH2B	0.0581083
eye development	GO:0001654	2	LHX5; FGF9	0.0614167
fatty acid beta-oxidation using acyl-CoA dehydrogenase	GO:0033539	2	ETFA; ACOX3	0.0614167
positive chemotaxis	GO:0050918	2	HGF; WNT11	0.0614167
spinal cord motor neuron differentiation	GO:0021522	2	NKX2-2; OLIG2	0.0614167
centrosome localization	GO:0051642	2	NDEL1; SEMA6A	0.0614167
neurotransmitter secretion	GO:0007269	2	NRXN3; CACNA1B	0.0614167
neuron migration	GO:0001764	5	GJA1; NDEL1; VAX1; GATA3; NTN1	0.0622175
cell fate commitment	GO:0045165	3	ONECUT1; SPRY2; WNT11	0.0670694
heart looping	GO:0001947	3	CITED2; GJA1; HAND2	0.0670694
positive regulation of cytosolic calcium ion concentration	GO:0007204	3	OPRM1; ADRA1D; CD36	0.0670694
post-embryonic development	GO:0009791	4	TET2; CSRNP1; GATA3; SEMA3C	0.0700471
chondrocyte differentiation	GO:0002062	2	FGF9; PTH2R	0.0730678
negative regulation of keratinocyte proliferation	GO:0010839	2	KLF9; CASK	0.0730678
DNA integration	GO:0015074	2	ENSGALG00000049807; ENSGALG00000046715	0.0730678
positive regulation of cell-matrix adhesion	GO:0001954	2	CD36; DMD	0.0730678
ventricular septum morphogenesis	GO:0060412	2	CITED2; WNT11	0.0730678
innervation	GO:0060384	2	SLITRK6; ISL1	0.0730678
lipid homeostasis	GO:0055088	2	ETFA; ACOX3	0.0730678
carbohydrate phosphorylation	GO:0046835	2	PFKFB3; HK2	0.0730678
regulation of cell growth	GO:0001558	3	SGK1; WFDC1; CRIM1	0.0743989
fibroblast growth factor receptor signaling pathway	GO:0008543	3	IQGAP1; FLRT2; FGF9	0.0743989
activation of GTPase activity	GO:0090630	4	ENSGALG00000044730; TBC1D4; TBC1D12; NDEL1	0.0756323
positive regulation of GTPase activity	GO:0043547	14	RTN4R; IQGAP1; ARHGEF17; LOC101752211; GARNL3; RASA3; RAP1GDS1; WNT11; ADGRB3; ENSGALG00000049443; RASGRP3; ARAP3; ENSGALG00000048508; ARFGAP1	0.0844003
negative regulation of neuron apoptotic process	GO:0043524	5	GFRAL; ISL1; EN2; CNTFR; TFAP2D	0.0851468
DNA metabolic process	GO:0006259	2	ENSGALG00000048294; ENSGALG00000053434	0.0853572
middle ear morphogenesis	GO:0042474	2	MSX1; INSIG1	0.0853572
release of sequestered calcium ion into cytosol	GO:0051209	2	RASA3; TPCN1	0.0853572
negative regulation of GTPase activity	GO:0034260	2	SPRY2; SLIT2	0.0853572
oligodendrocyte differentiation	GO:0048709	2	SOX10; TRPC4	0.0853572
positive regulation of vasoconstriction	GO:0045907	2	ADRA1D; AVPR1A	0.0853572
regulation of heart contraction	GO:0008016	2	CACNA1B; ISL1	0.0853572
cardiac muscle cell differentiation	GO:0055007	2	HAND2; TBX5	0.0853572
ventricular septum development	GO:0003281	2	TBX5; GATA3	0.0853572
nervous system development	GO:0007399	4	KIF2A; PLPPR1; PCSK2; SIM2	0.0874507
lung development	GO:0030324	3	TBX5; PDGFRA; SIM2	0.0900588
negative regulation of NF-kappaB transcription factor activity	GO:0032088	4	ENSGALG00000050753; RWDD3; ENSGALG00000050756; ENSGALG00000038550	0.0936753
positive regulation of protein kinase B signaling	GO:0051897	4	SPRY2; OSBPL8; FAM110C; GATA3	0.0936753
cell proliferation	GO:0008283	6	TYR; PAX1; OCA2; ZIC5; HTR1A; HOXB4	0.0976969
N-glycan processing	GO:0006491	2	FUT8; MAN1A1	0.0982127
platelet-derived growth factor receptor signaling pathway	GO:0048008	2	IQGAP1; CSRNP1	0.0982127
regulation of neuron projection development	GO:0010975	2	GATA3; NDEL1	0.0982127
negative regulation of axon extension involved in axon guidance	GO:0048843	2	SEMA3C; SEMA6A	0.0982127
proton transport	GO:0015992	2	SLC2A10; SLC2A12	0.0982127
positive regulation of transcription factor import into nucleus	GO:0042993	2	FLNA; PIK3R1	0.0982127
phosphatidylinositol 3-kinase signaling	GO:0014065	2	PIK3R1; GATA3	0.0982127
ionotropic glutamate receptor signaling pathway	GO:0035235	2	GRIK1; GRIN3A	0.0982127
cellular response to hormone stimulus	GO:0032870	2	SLIT2; AVPR1A	0.0982127
RNA phosphodiester bond hydrolysis, endonucleolytic	GO:0090502	3	ENSGALG00000049807; RNASEH2B; ENSGALG00000046715	0.0983615
